# Supplementary material
Source: PubMed Central journal article supplement (PMC514926)
Supplement: 7600309s1.pdf [file 7600309s1.pdf]

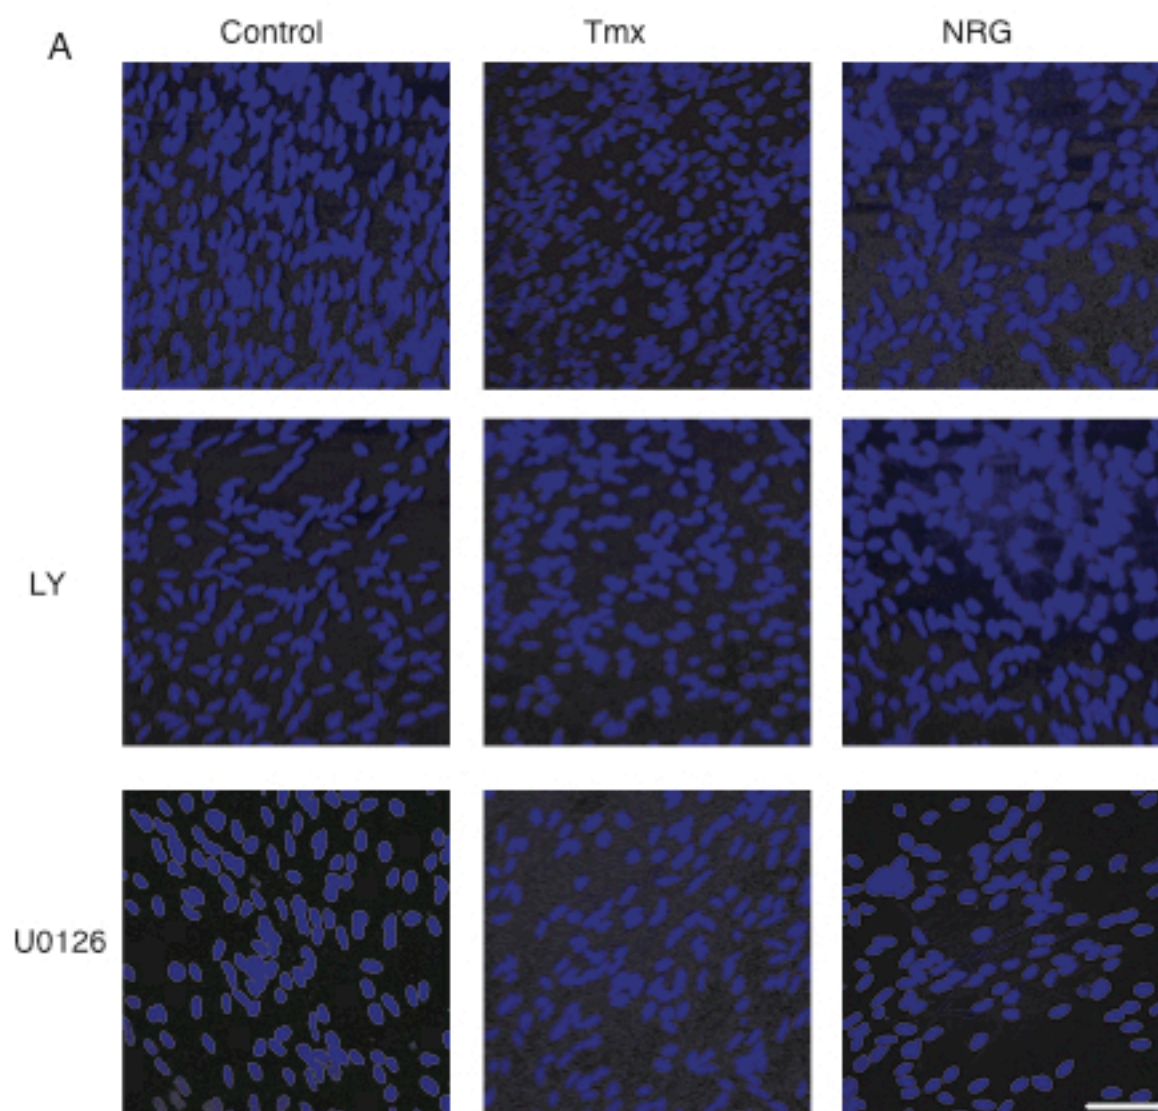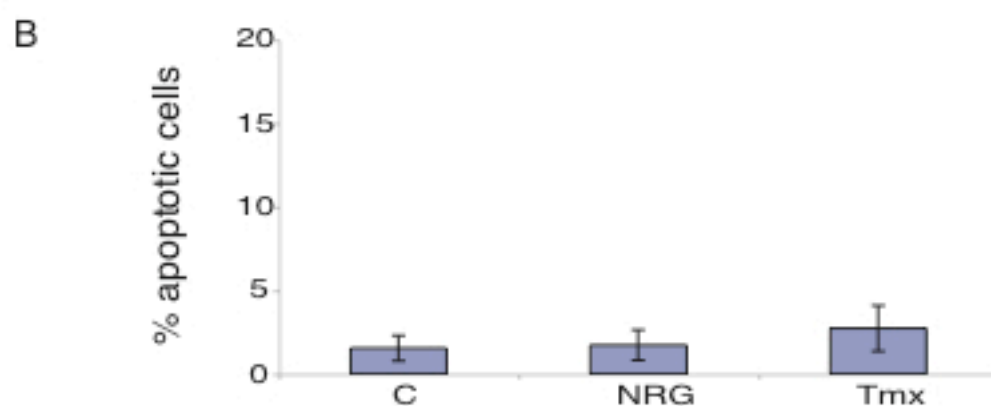

Figure 1S. Raf activation does not result in increased apoptosis over 72hrs. (A) Myelinated DRG-Schwann cell cultures were treated with control solvents (C), NRG or Tmx in the presence or absence of 30 $\mu$ M U0126 or 20 $\mu$ M LY 294002 for 72hrs. Cells were stained with anti- MBP antibody (Fig. 6A) and Hoechst. Scale bar 50 $\mu$ m. (B) A TUNEL assay was carried out on DRG- Schwann cell cultures treated with control solvents (C), Tmx or NRG for 72hrs using the ApoTag Fluorescein In Situ Apoptosis Detection kit (Chemicon) according to the manufacturers instructions.
