# Supplementary material
Source: PubMed Central journal article supplement (PMC514926)
Supplement: 7600309s2.pdf [file 7600309s2.pdf]

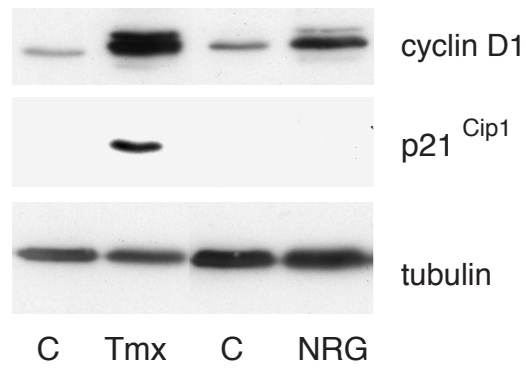

Figure 2S. NRG addition does not induce p21<sup>Cip1</sup>. Schwann cells were placed in defined medium in the presence of control solvents (C), Tmx or NRG for 2 days. Lysates were analysed by Western blotting with the specified antibodies.
